# Supplementary material for: Statistical context dictates the relationship between feedback-related EEG signals and learning
Source: eLife journal article supplement (doi:10.7554/elife.46975), 2019-08-21
Supplement: supp [file elife-46975-supp-v1.zip]

Archive with 5 entries (5 files):
- elife_poa_e46975_Figure_4_figure_supplement_1.eps
- elife_poa_e46975_Transparent_Reporting_File.pdf
- elife_poa_e46975_Figure_3_figure_supplement_1.eps
- elife_poa_e46975_Figure_3_figure_supplement_2.eps
- elife_poa_e46975_Figure_2_figure_supplement_1.eps
